# Supplementary material
Source: PubMed Central journal article supplement (PMC3188864)

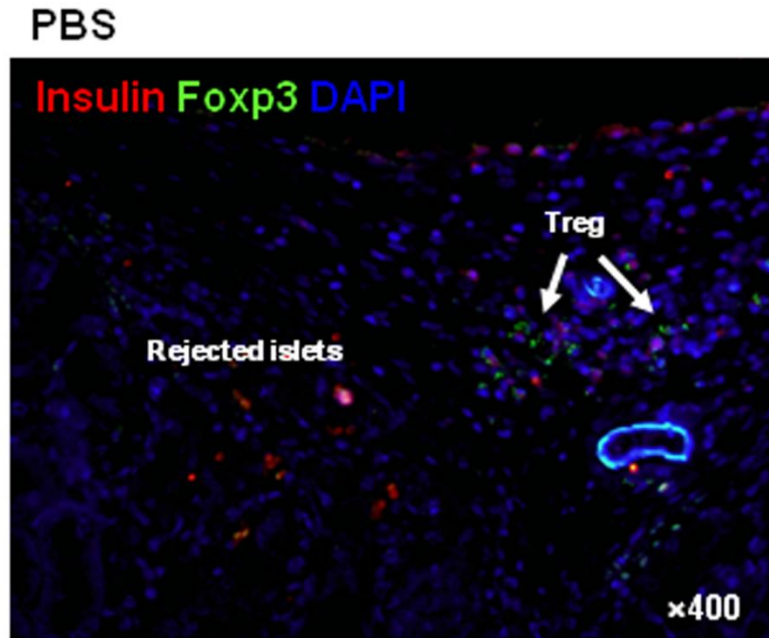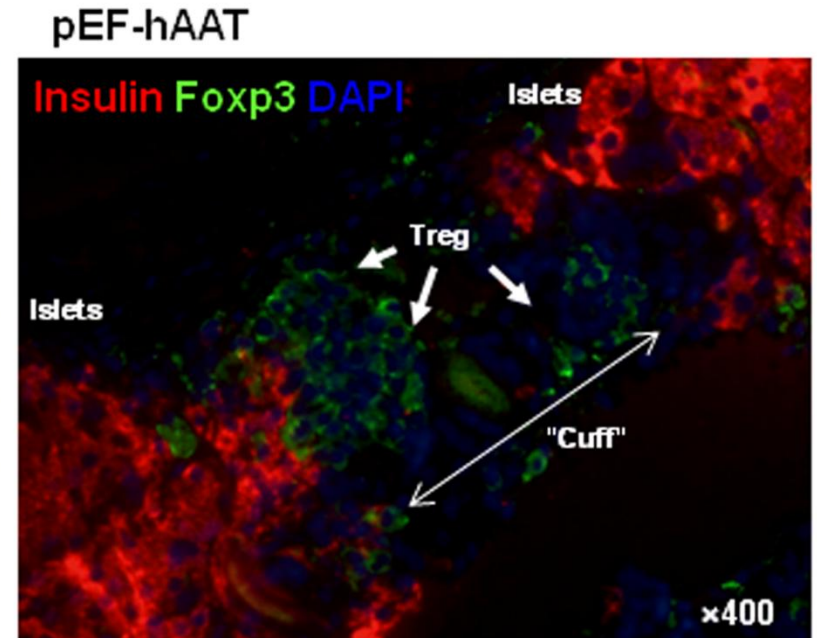

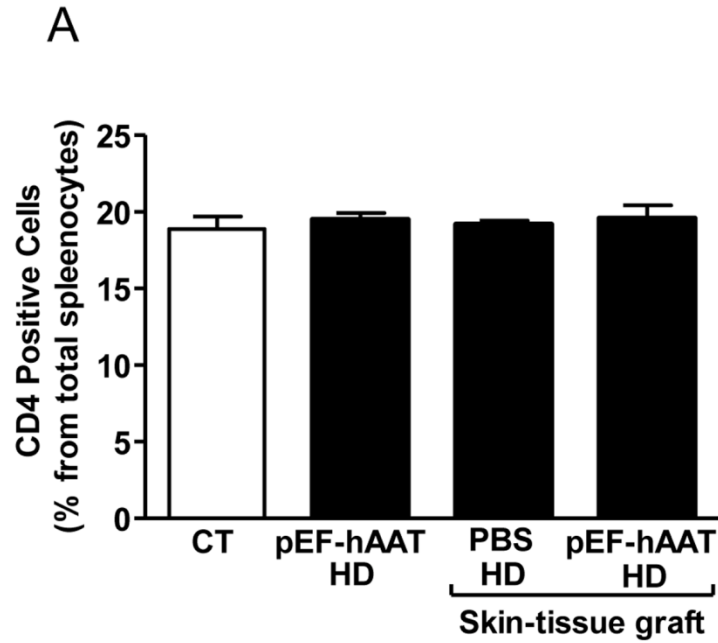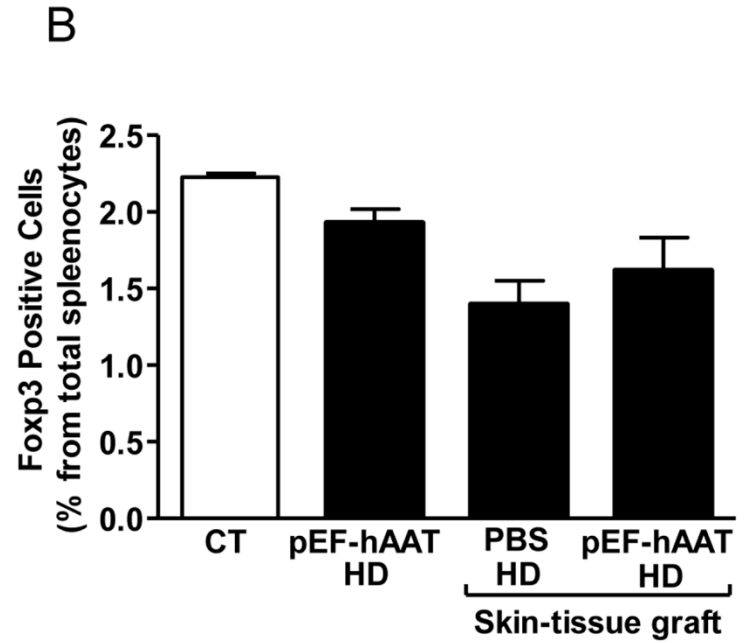

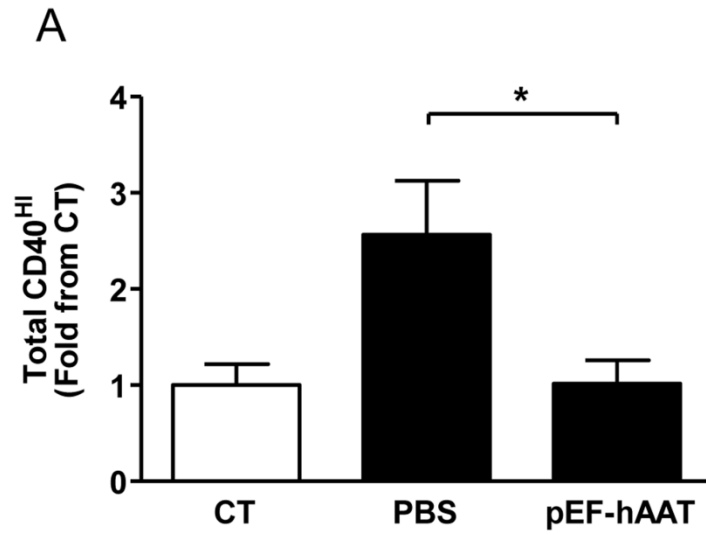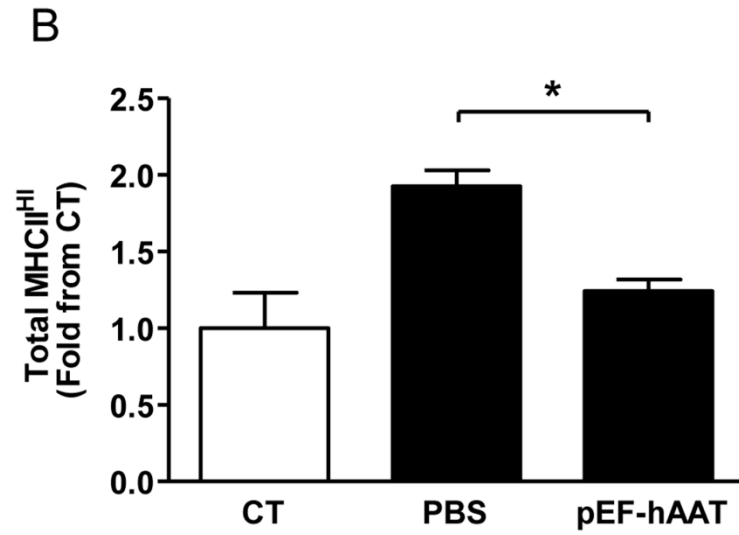

Supplement: 11_145_Galit_Suppl.pdf [file 11_145_Galit_Suppl.pdf]
